# Supplementary material for: Pyridine vs. Imidazole Axial Ligation on Cobaloxime Grafted Graphene: Hydrogen Evolution Reaction Insights
Source: MDPI journal article supplement (doi:10.3390/nano12173077), 2022-09-05
Supplement: s1 [file s1]

Supplementary Material

# Pyridine vs. Imidazole Axial Ligation on Cobaloxime Grafted Graphene: Hydrogen Evolution Reaction Insights

Ioanna K. Sideri <sup>1</sup>, Georgios Charalambidis <sup>2</sup>, Athanassios G. Coutsolelos <sup>2</sup>, Raul Arenal <sup>3,4,5</sup> and Nikos Tagmatarchis <sup>1,\*</sup>

<sup>1</sup> Theoretical and Physical Chemistry Institute, National Hellenic Research Foundation, 11635 Athens, Greece

<sup>2</sup> Chemistry Department, Laboratory of BioInorganic Chemistry, University of Crete, 710 03 Heraklion, Greece

<sup>3</sup> Laboratorio de Microscopias Avanzadas (LMA), Universidad de Zaragoza, 50018 Zaragoza, Spain

<sup>4</sup> Instituto de Nanociencia y Materiales de Aragon (INMA), CSIC-U. de Zaragoza, 50009 Zaragoza, Spain

<sup>5</sup> ARAID Foundation, 50018 Zaragoza, Spain

\* Correspondence: tagmatar@eie.gr

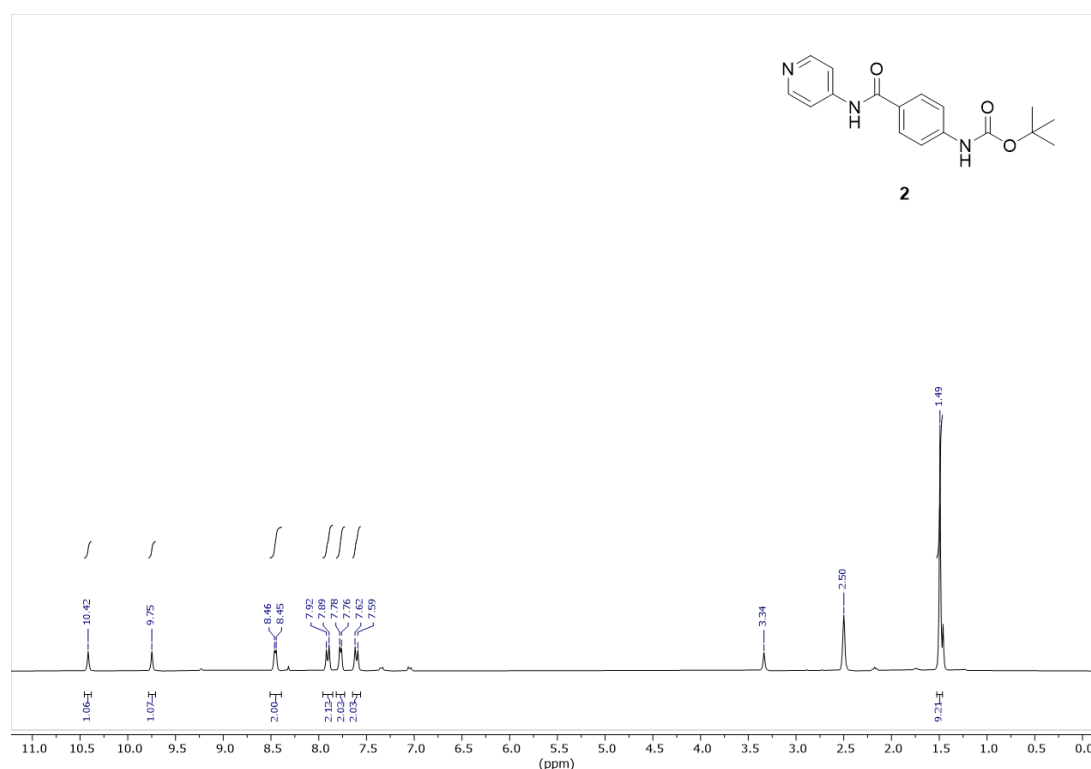

**Figure S1.** <sup>1</sup>H NMR (300 MHz, DMSO-*d*<sub>6</sub>) spectrum of compound 2.

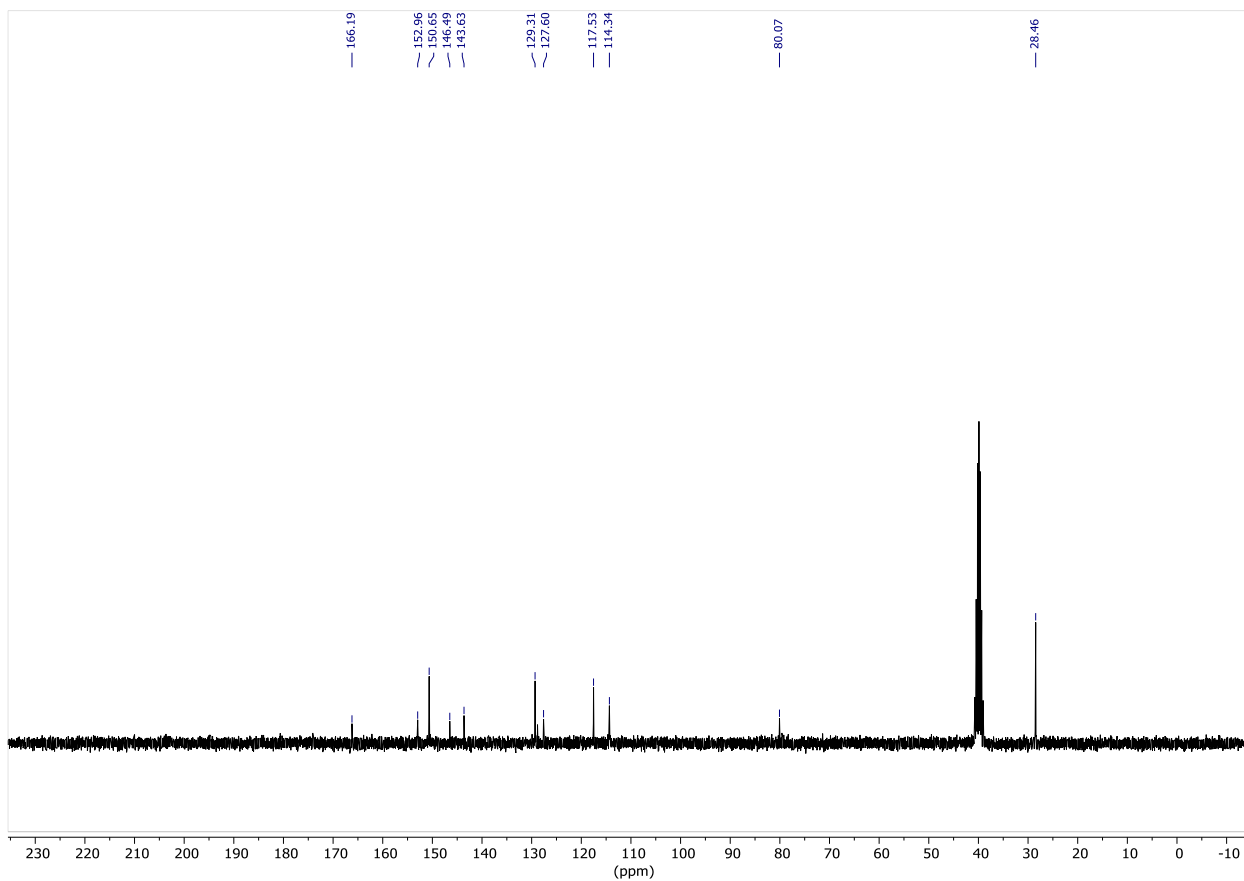

Figure S2.  $^{13}\text{C}\{1\}$  NMR (75.5 MHz,  $\text{DMSO}-d_6$ ) spectrum of compound 2.

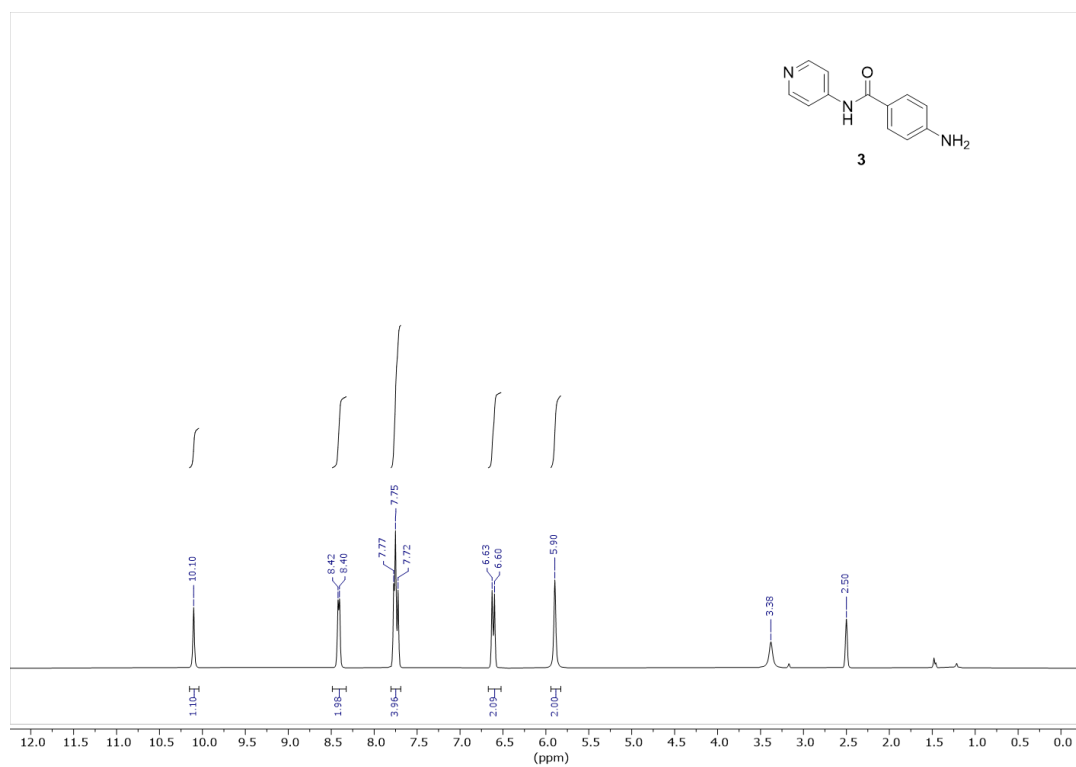

Figure S3.  $^1\text{H}$  NMR (300 MHz,  $\text{DMSO}-d_6$ ) spectrum of compound 3.

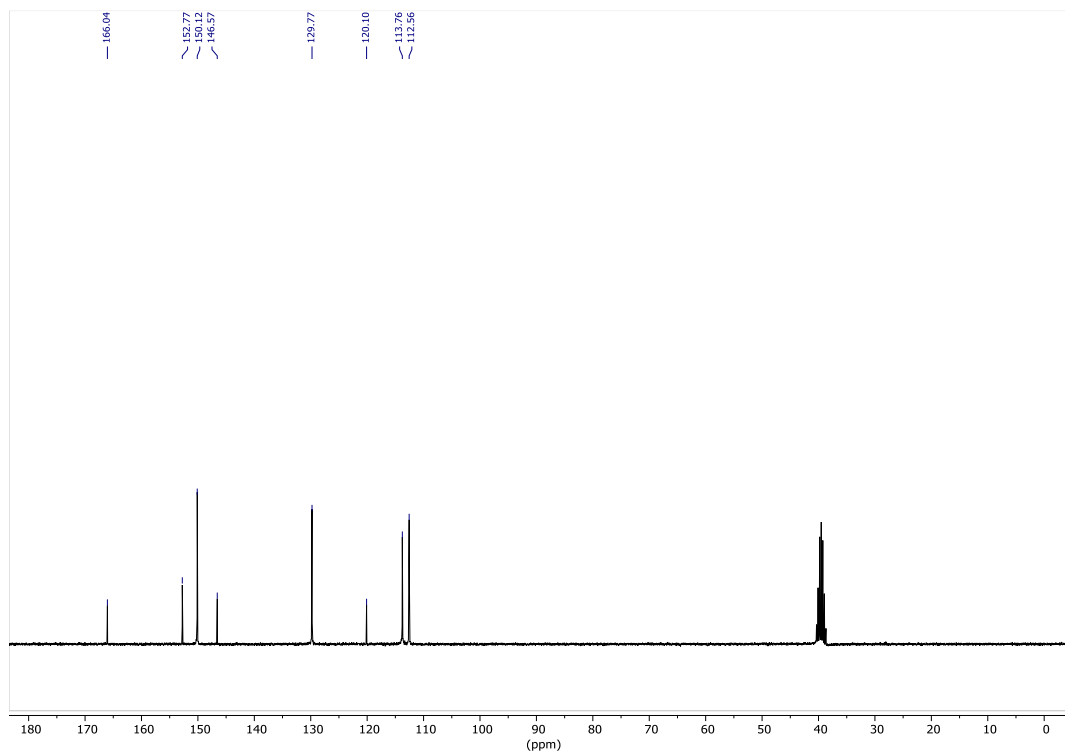

Figure S4.  $^{13}\text{C}\{^1\text{H}\}$  NMR (75.5 MHz,  $\text{DMSO-}d_6$ ) spectrum of compound 3.

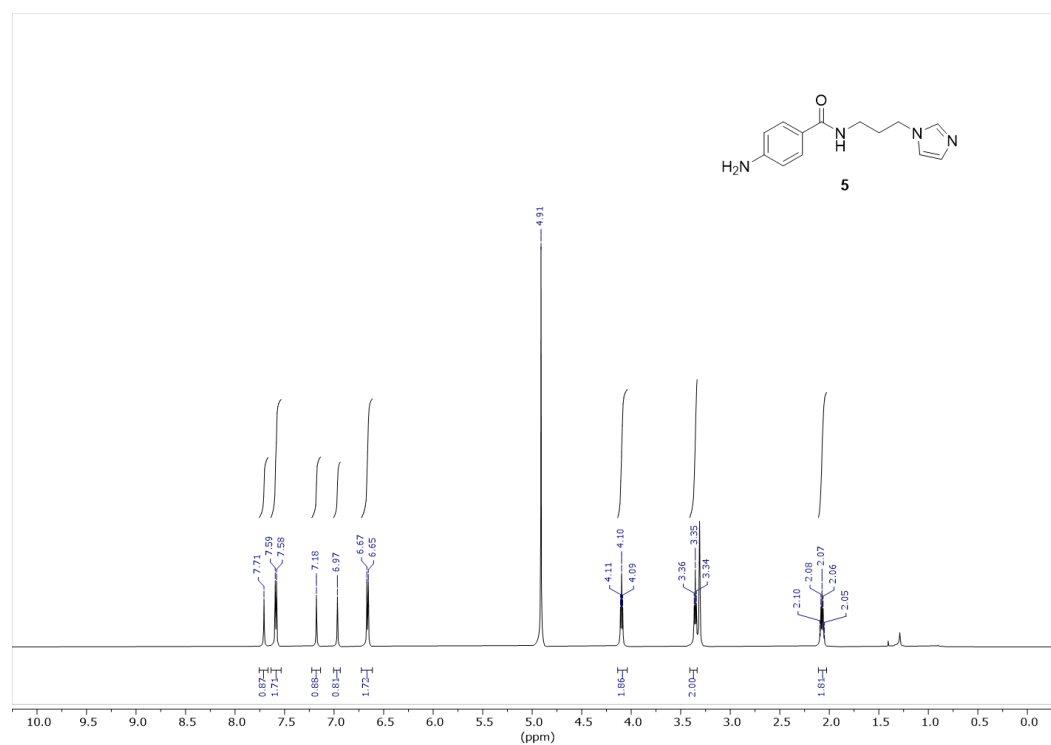

Figure S5.  $^1\text{H}$  NMR (600 MHz,  $\text{CD}_3\text{OD-}d_4$ ) spectrum of compound 5.

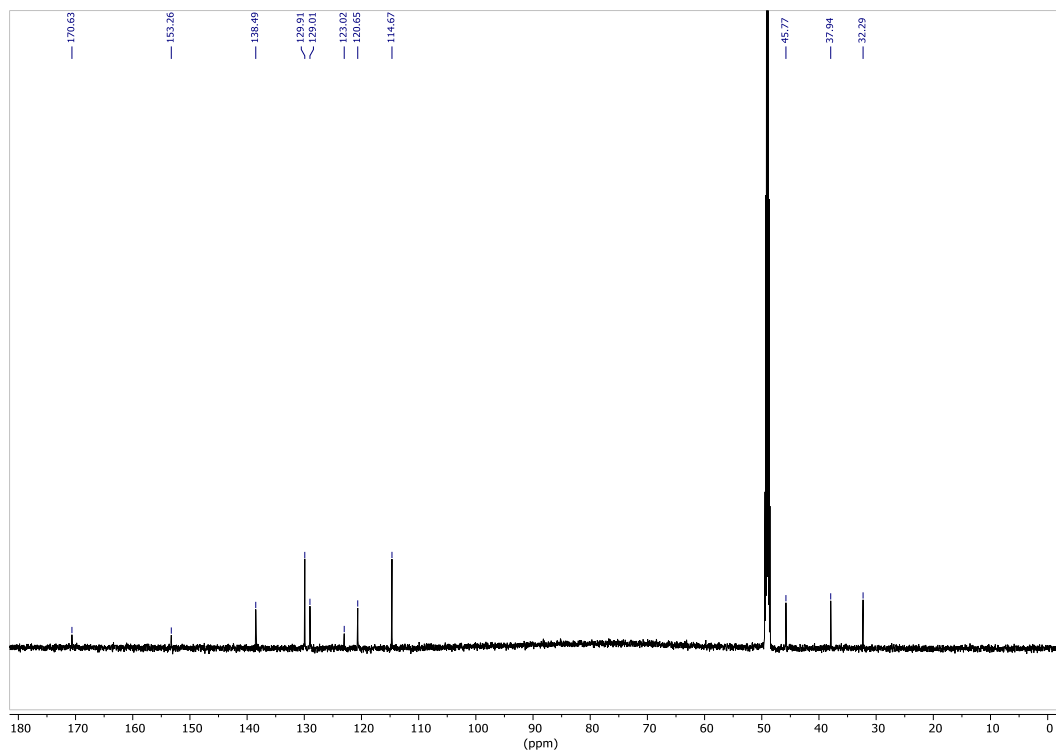

Figure S6.  $^{13}\text{C}\{^1\text{H}\}$  NMR (150.9 MHz,  $\text{CD}_3\text{OD}-d_4$ ) spectrum of compound 5.

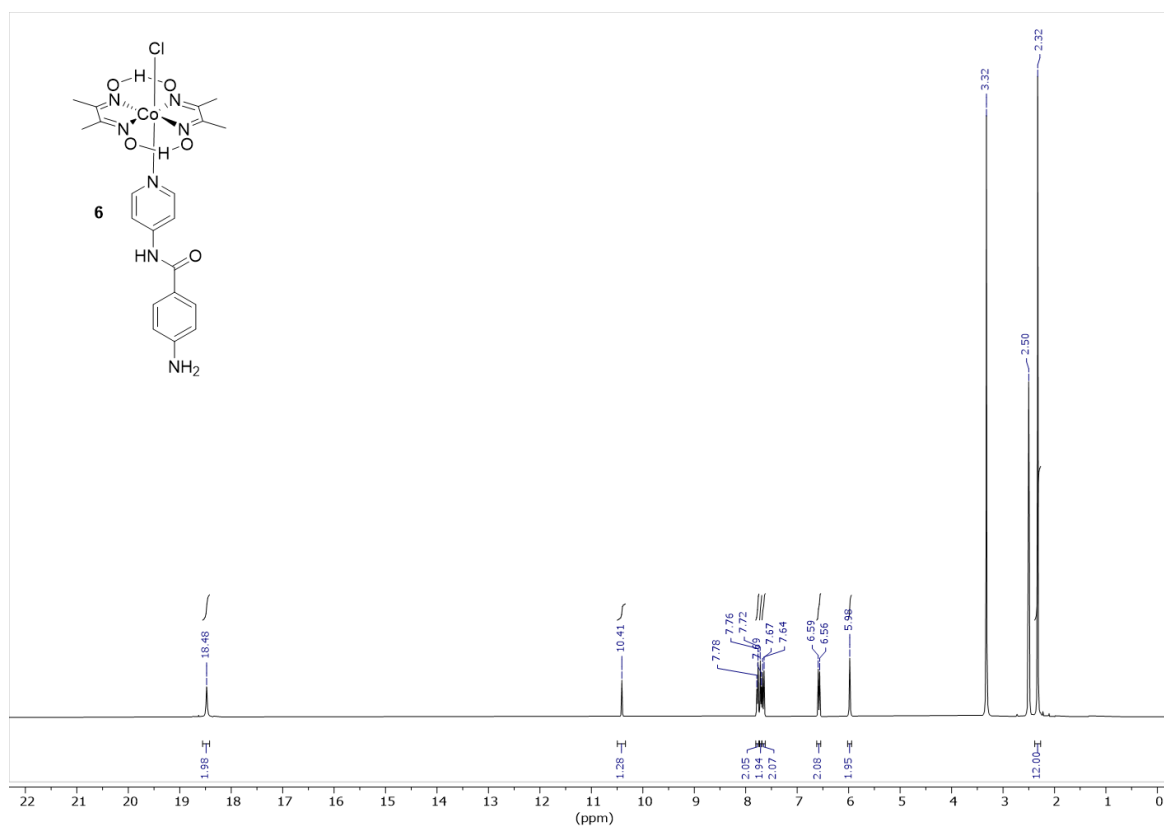

Figure S7.  $^1\text{H}$  NMR (600 MHz,  $\text{DMSO}-d_6$ ) spectrum of compound 6.

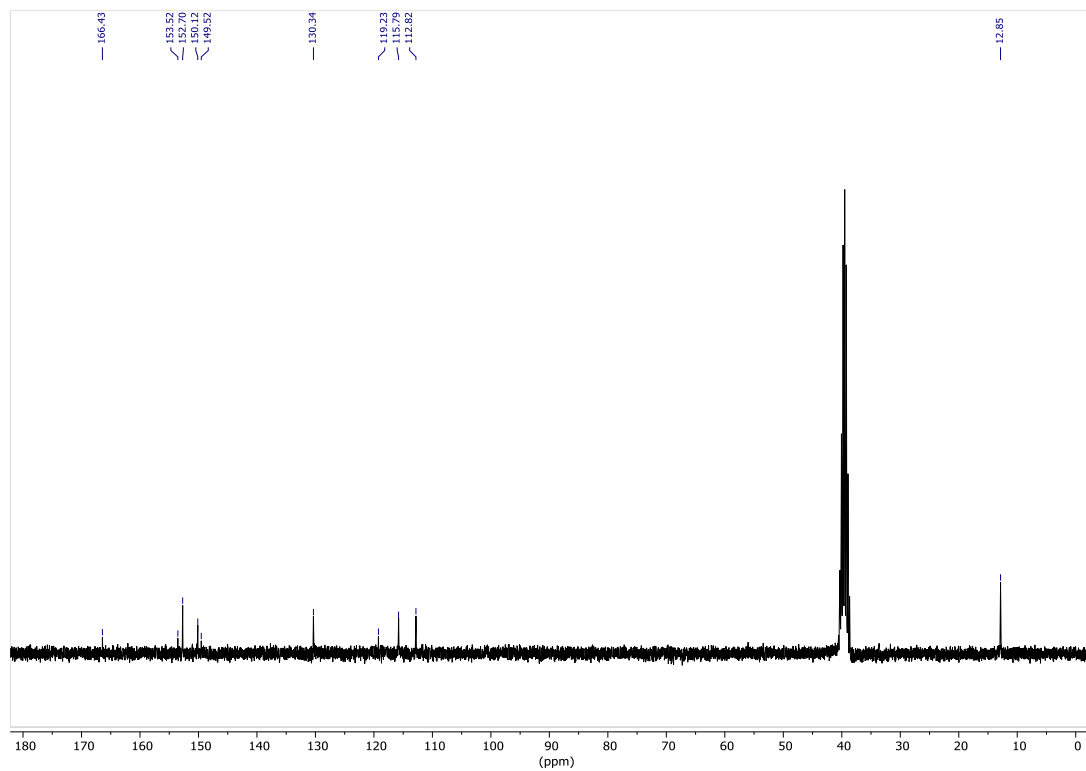

Figure S8.  $^{13}\text{C}\{^1\text{H}\}$  NMR (150.9 MHz,  $\text{DMSO}-d_6$ ) spectrum of compound 6.

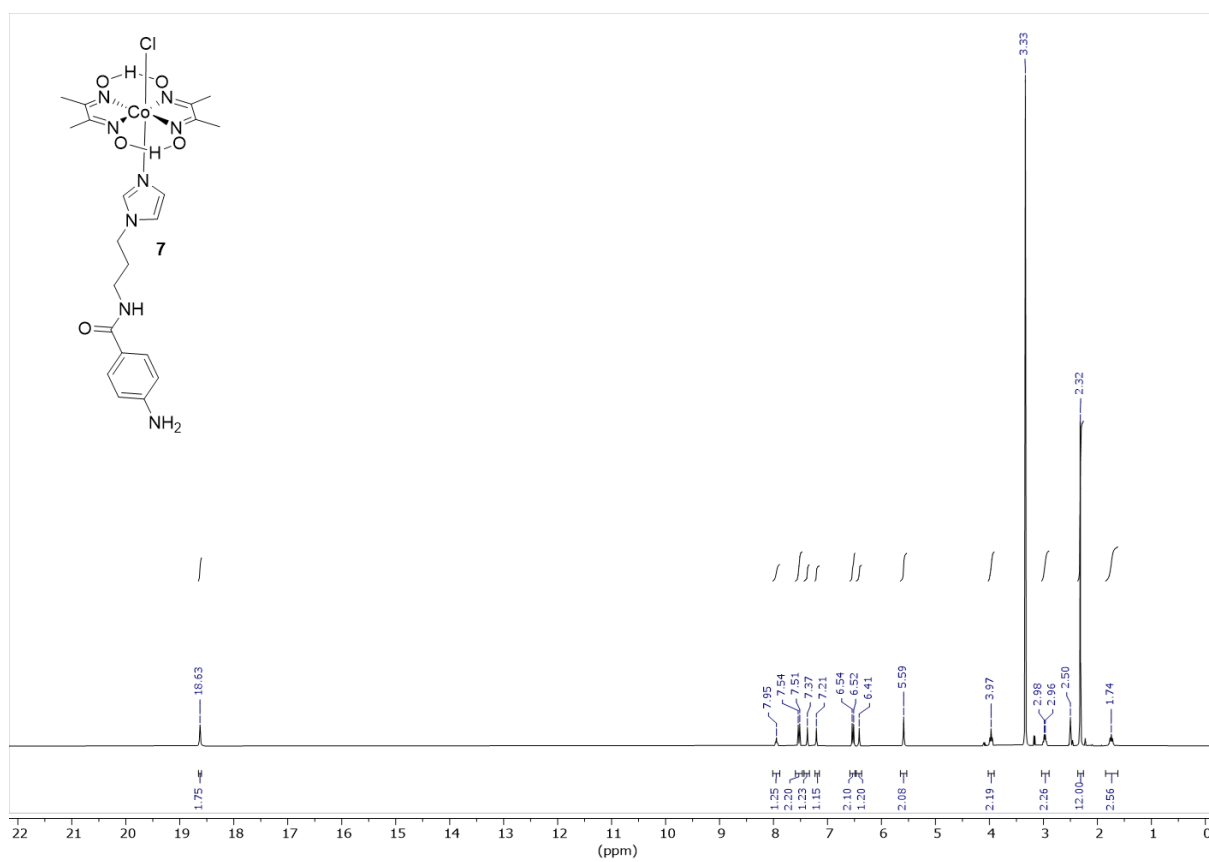

Figure S9.  $^1\text{H}$  NMR (300 MHz,  $\text{DMSO}-d_6$ ) spectrum of compound 7.

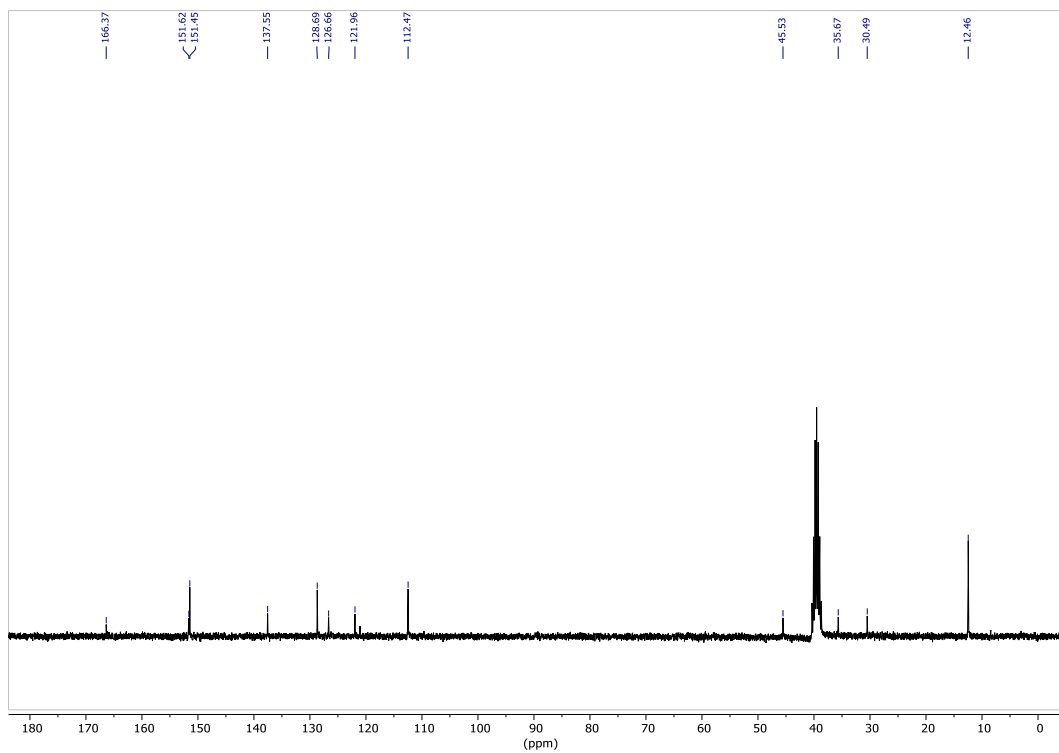

**Figure S10.**  $^{13}\text{C}\{1\}$  NMR (75.5 MHz,  $\text{DMSO-}d_6$ ) of spectrum compound 7.
